# Supplementary material for: Antimicrobial Activity and Molecular Docking Studies of the Biotransformation of Diterpene Acanthoic Acid Using the Fungus Xylaria sp
Source: MDPI journal article supplement (doi:10.3390/antibiotics12081331), 2023-08-18
Supplement: s1 [file s1]

# Antimicrobial Activity and Molecular Docking Studies of the Biotransformation of Diterpene Acanthoic Acid Using the Fungus *Xylaria* sp.

Andrey Moacir do Rosario Marinho <sup>1,\*</sup>, Claudia Maria S. C. de Oliveira <sup>2</sup>, João Victor Silva-Silva <sup>3,\*</sup>, Samara C. Anchieta de Jesus <sup>1</sup>, José Edson S. Siqueira <sup>1</sup>, Luana C. de Oliveira <sup>1</sup>, Jéssica Fernandes Auzier <sup>4</sup>, Liviane N. Soares <sup>4</sup>, Maria Lúcia Belém Pinheiro <sup>4</sup>, Sebastião C. Silva <sup>2</sup>, Livia S. Medeiros <sup>5</sup>, Emmanoel V. Costa <sup>4</sup> and Patrícia S. Barbosa Marinho <sup>1</sup>

<sup>1</sup> Post-Graduation in Chemistry, Federal University of Pará, Belém 66075-110, PA, Brazil; samaraibma@gmail.com (S.C.A.d.J.); siqueira.edson@outlook.com (J.E.S.S.); luanaoliveira.qi@gmail.com (L.C.d.O.); pat@ufpa.br (P.S.B.M.)

<sup>2</sup> Post-Graduation in Chemistry, Federal University of South and Southeast of Pará, Marabá 68507-590, PA, Brazil; claudiamscosta08@gmail.com (C.M.S.C.d.O.); simotesilva@unifesspa.edu.br (S.C.S.)

<sup>3</sup> Laboratory of Medicinal and Computational Chemistry, Institute of Physics of São Carlos, University of São Paulo, São Carlos 13418-900, SP, Brazil

<sup>4</sup> Post-Graduation in Chemistry, Federal University of Amazonas, Manaus 69077-000, AM, Brazil; jessicafauzier27@gmail.com (J.F.A.); bem.liviane@gmail.com (L.N.S.); lbelem1@gmail.com (M.L.B.P.); emmanoelvc@gmail.com (E.V.C.)

<sup>5</sup> Post-Graduation in Chemistry, Federal University of São Paulo, Diadema 09920-000, SP, Brazil; livia.soman@unifesp.br

\* Correspondence: andrey@ufpa.br (A.M.d.R.M.); jvssilva89@gmail.com (J.V.S.-S.)

**Figure S1.** <sup>1</sup>H NMR spectrum (400 MHz, CDCl<sub>3</sub>) of compound **S1**. A) full spectrum; B) Expansion 2.00 to 6.00 ppm; C) Expansion 0.00 to 3.00 ppm

**Figure S2.** <sup>13</sup>C NMR spectrum (100 MHz, CDCl<sub>3</sub>) of compound **S1**. A) full spectrum; B) Expansion 10.0 to 75.0 ppm

**Figure S3.** HSQC spectrum of **S1** (CDCl<sub>3</sub>, 400 MHz). A) full spectrum; B) Expansion

**Figure S4.** HMBC spectrum of **S1** (CDCl<sub>3</sub>, 400 MHz). A) Full spectrum; B) Expansion

**Figure S5.** COSY spectrum of **S1** (CDCl<sub>3</sub>, 400 MHz). A) Full spectrum; B) Expansion

**Figure S6.** Mass spectrum HR(ESI) negative ion mode of compound **S1**.

**Figure S7.** IR spectrum of compound **S1**.

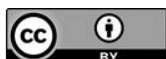

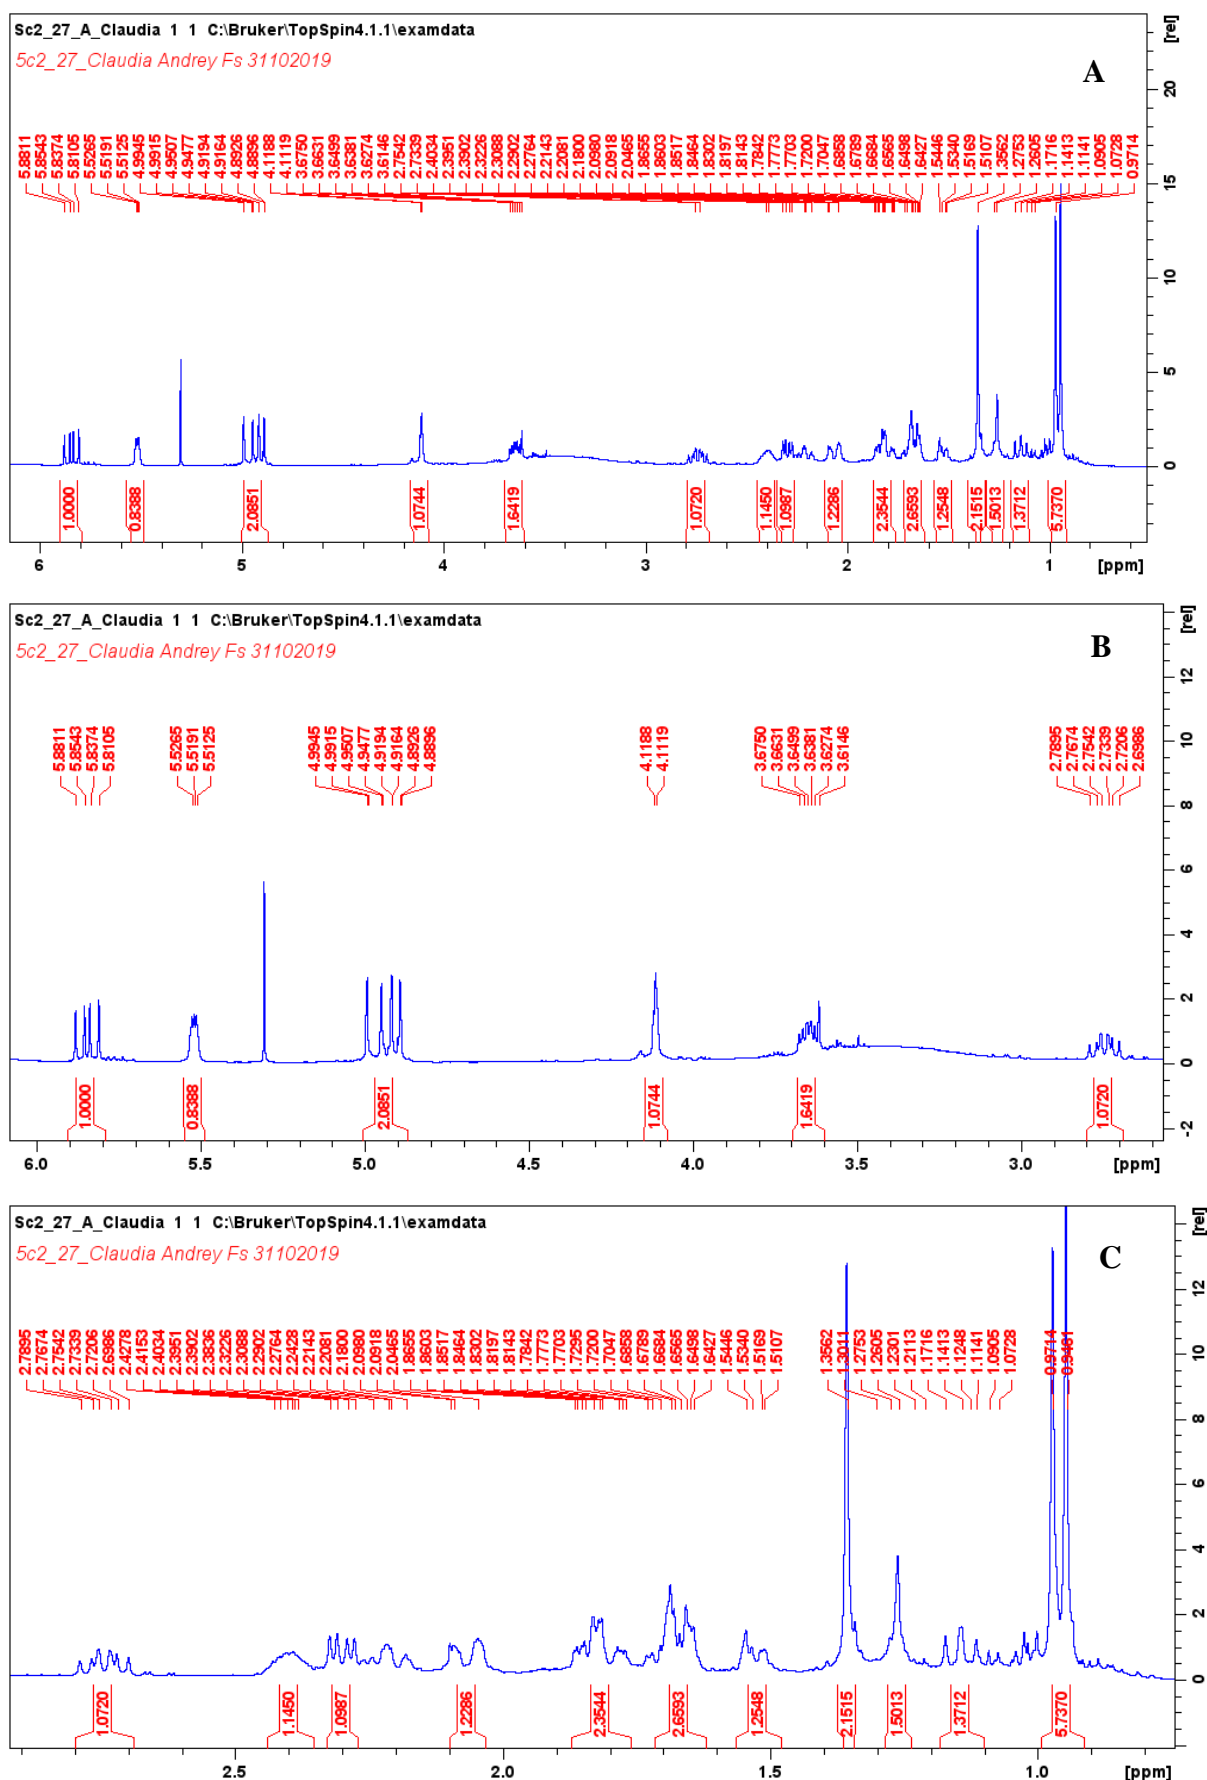

**Figure S1.**  $^1\text{H}$  NMR spectrum (400 MHz,  $\text{CDCl}_3$ ) of compound **S1**. A) full spectrum; B) Expansion 2.00 to 6.00 ppm; C) Expansion 0.00 to 3.00 ppm

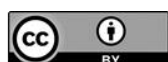

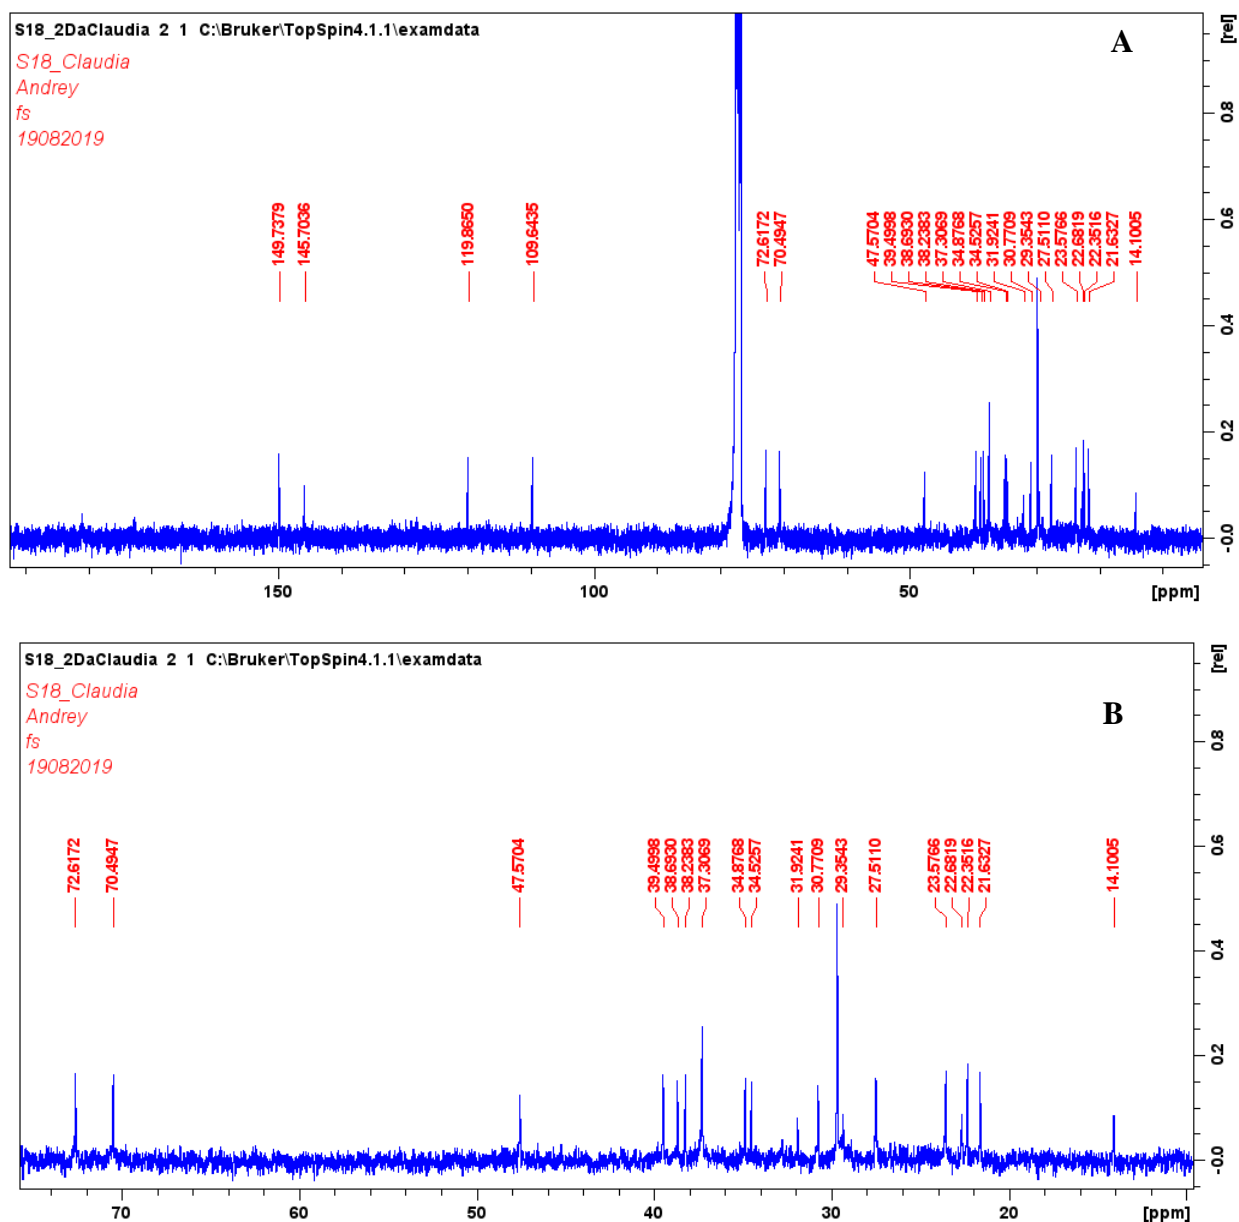

**Figure S2.**  $^{13}\text{C}$  NMR spectrum (100 MHz,  $\text{CDCl}_3$ ) of compound **S1**. A) full spectrum; B) Expansion 10.0 to 75.0 ppm

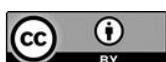

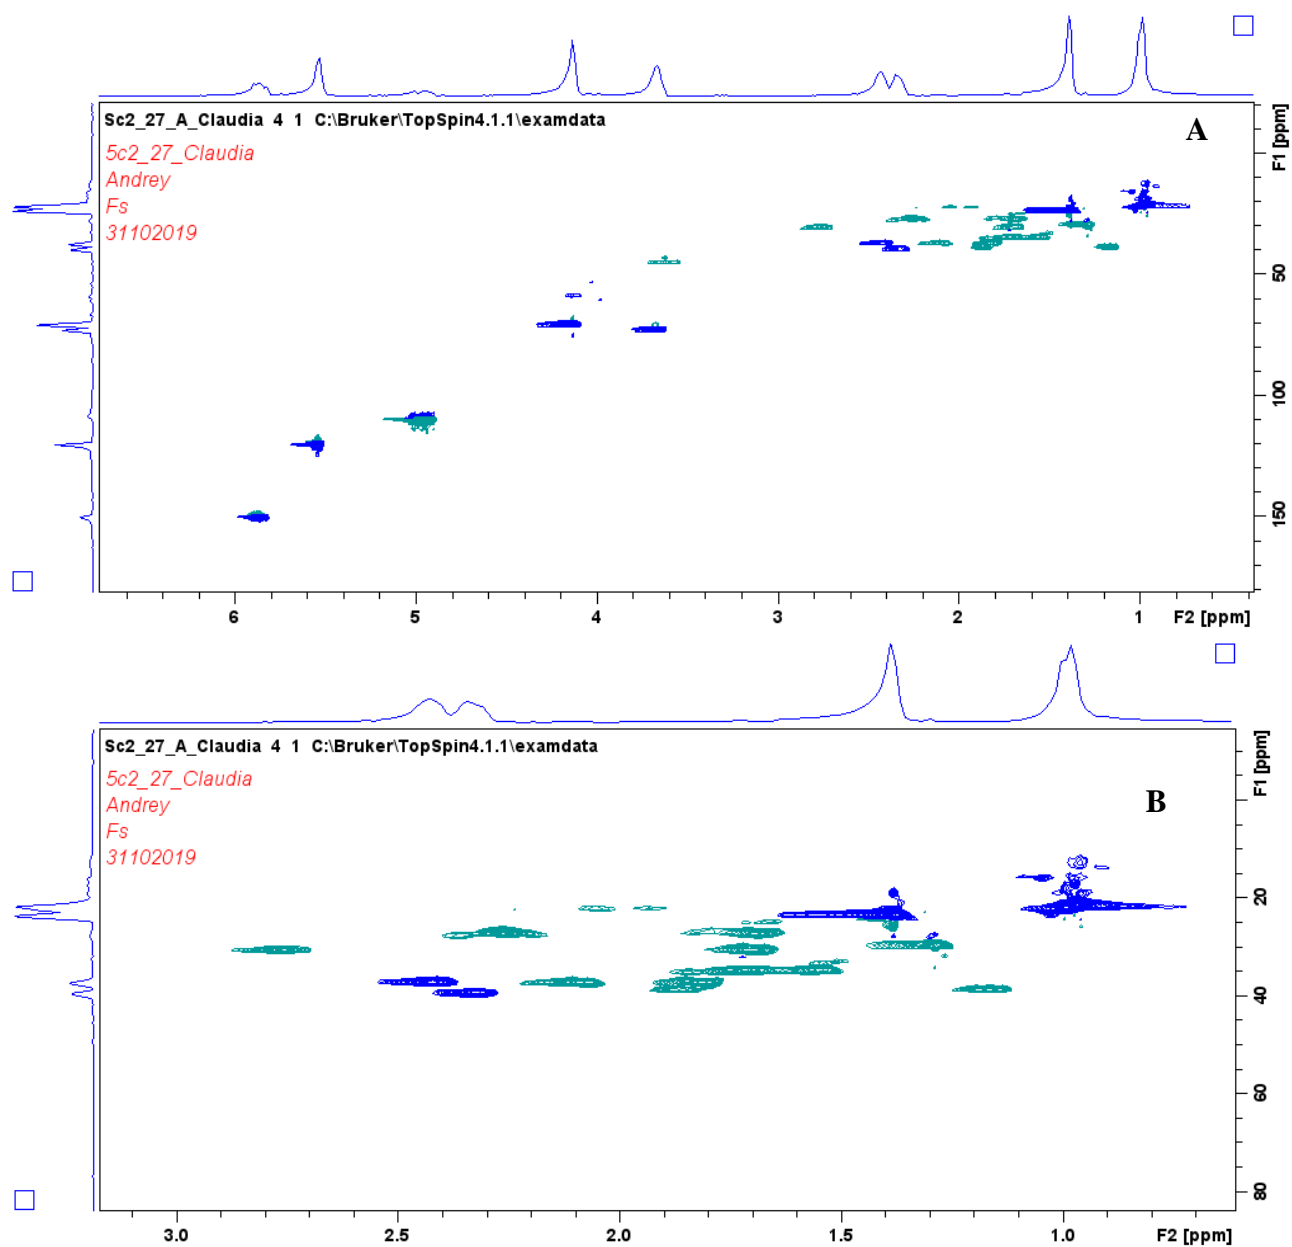

**Figure S3.** HSQC spectrum of **S1** (CDCl<sub>3</sub>, 400 MHz). A) full spectrum; B) Expansion

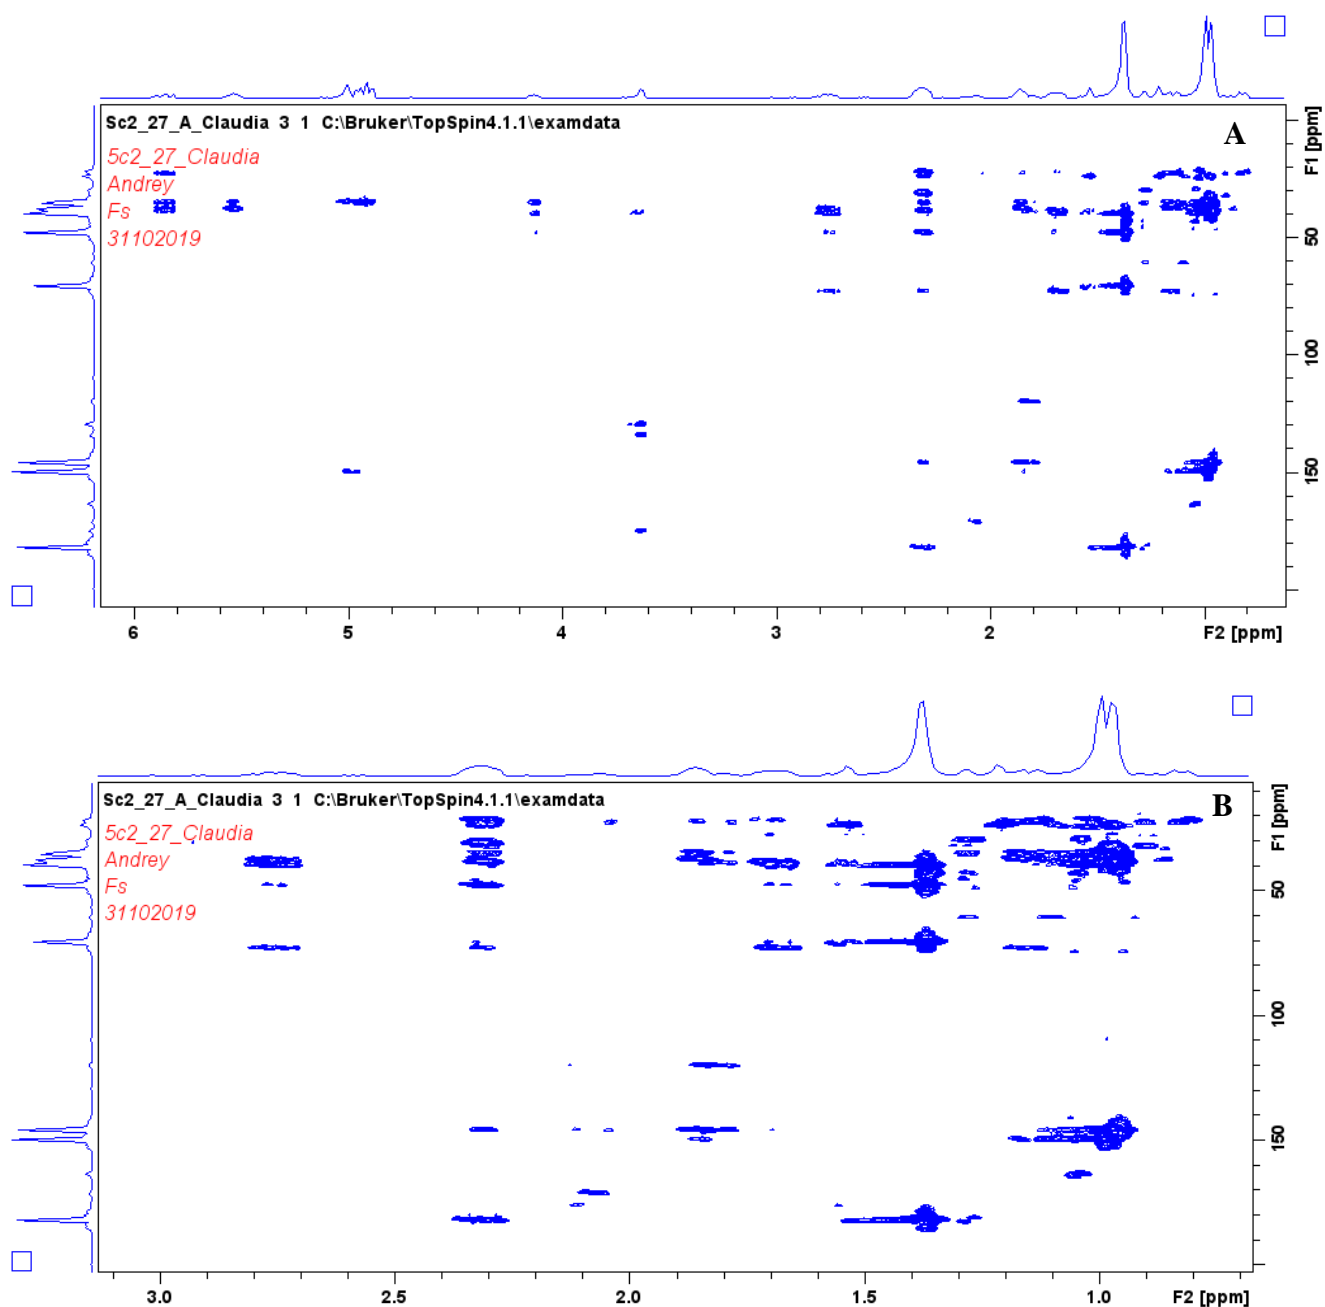

**Figure S4.** HMBC spectrum of **S1** (CDCl<sub>3</sub>, 400 MHz). A) Full spectrum; B) Expansion

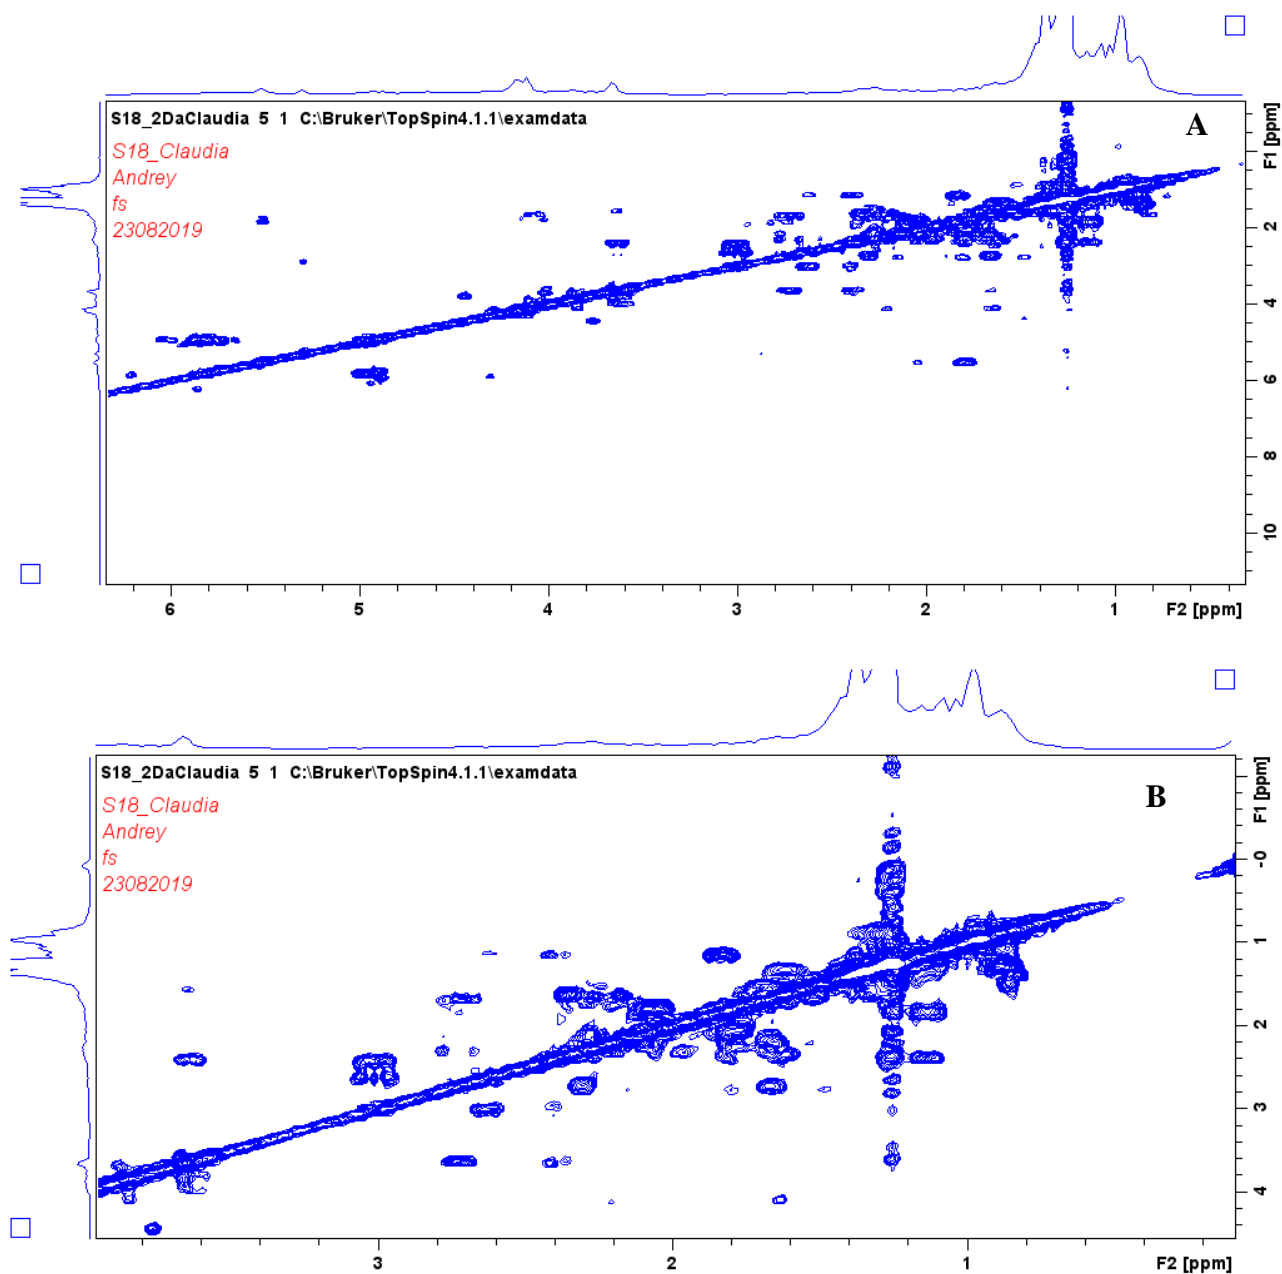

**Figure S5.** COSY spectrum of **S1** (CDCl<sub>3</sub>, 400 MHz). A) Full spectrum; B) Expansion

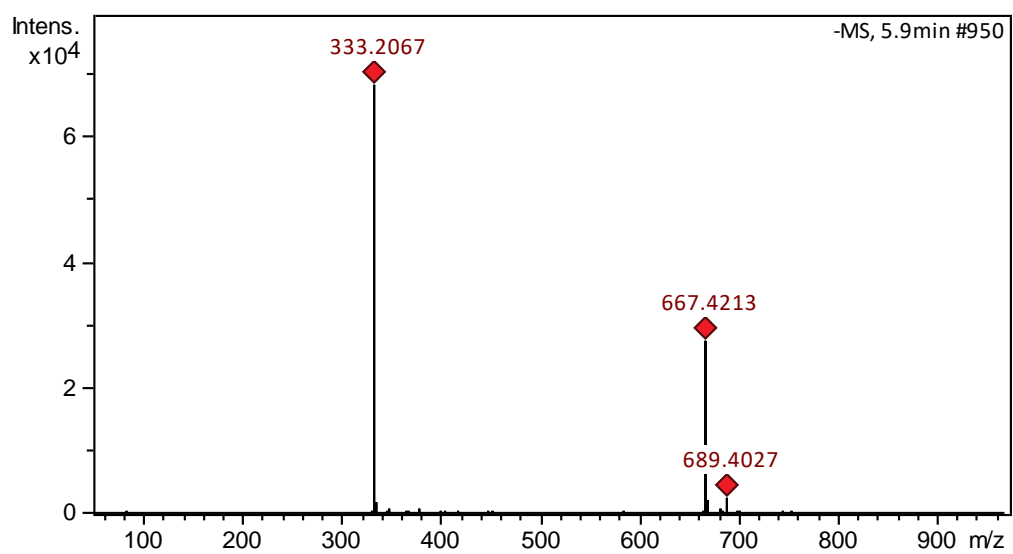

**Figure S6.** Mass spectrum HR(ESI) negative ion mode of compound S1.

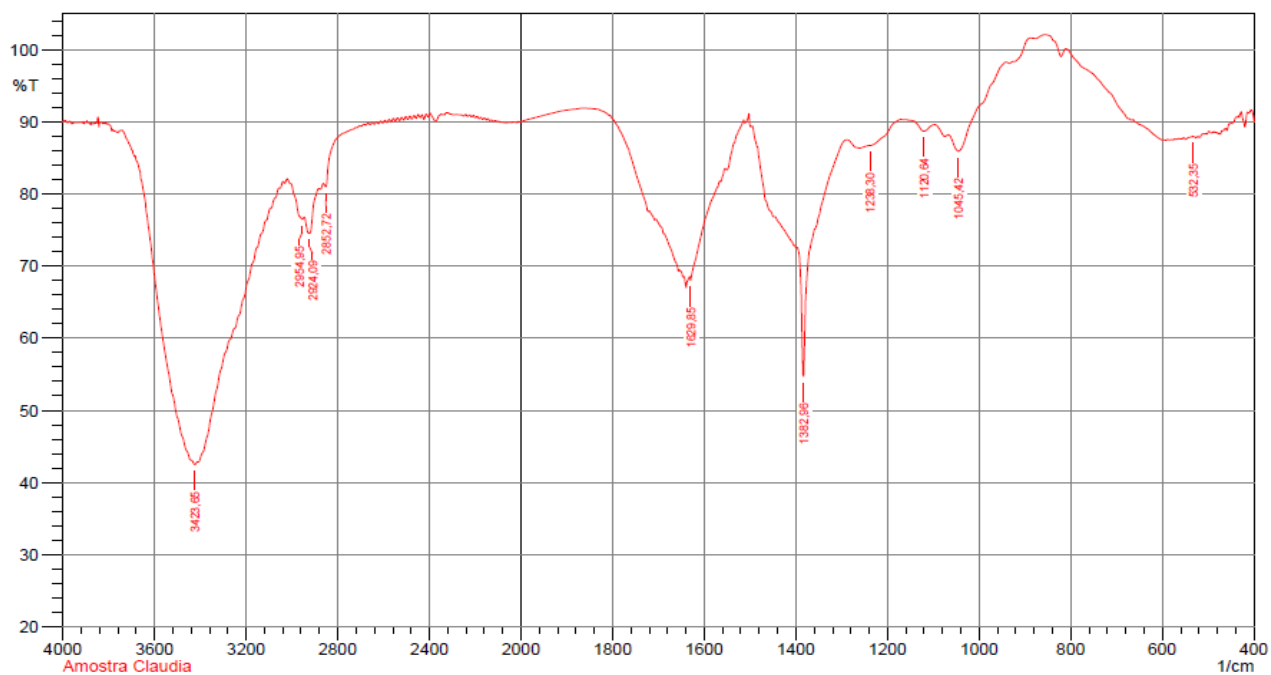

**Figure S7.** IR spectrum of compound S1.
